# Supplementary material for: All-around coating of CoNi nanoalloy using a hierarchically porous carbon derived from bimetallic MOFs for highly efficient hydrolytic dehydrogenation of ammonia-borane
Source: Royal Society of Chemistry journal article supplement (doi:10.1039/c9nj05484g), 2020-01-01
Supplement: c9nj05484g1.pdf [file c9nj05484g1.pdf]

**All-around coating of CoNi nanoalloy by hierarchically porous carbon derived from bimetallic MOFs for highly efficient hydrolytic dehydrogenation of ammonia-borane**

Min-Jie Chen,<sup>#a</sup> Dai-Xue Zhang,<sup>#b</sup> Dan Li,<sup>\*a</sup> Shan-Chao Ke,<sup>a</sup> Xiao-Chen Ma,<sup>a,b</sup>  
Gang-Gang Chang,<sup>\*a</sup> Jian Chen<sup>a</sup> and Xiao-Yu Yang<sup>b</sup>

*a. School of Chemistry, Chemical Engineering and Life Science, Wuhan University of Technology, Wuhan 430070, Hubei, China.*

*b. State Key Laboratory of Advanced Technology for Materials Synthesis and Processing, Wuhan University of Technology, 122, Luoshi Road, 430070, Wuhan, Hubei, China.*

*E-mail: shaoweitie@163.com; changgang2016@whut.edu.cn*

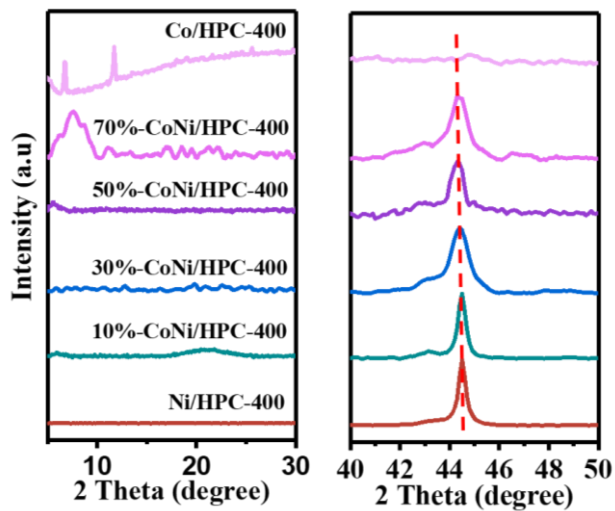

Fig.S1 XRD patterns of x%-CoNi/HPC-400.

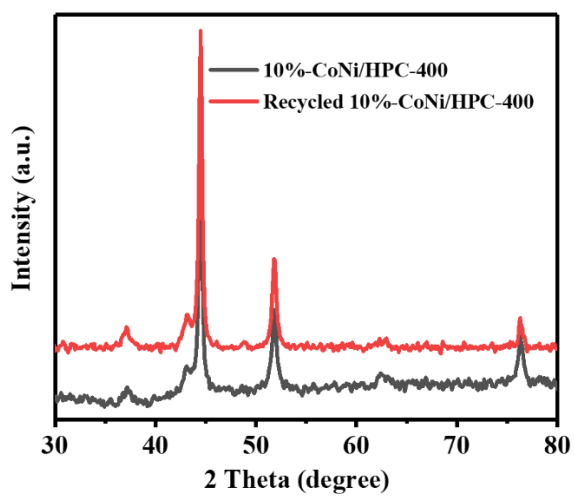

Fig.S2 XRD patterns of 10%-CoNi/HPC-400 before and after reaction

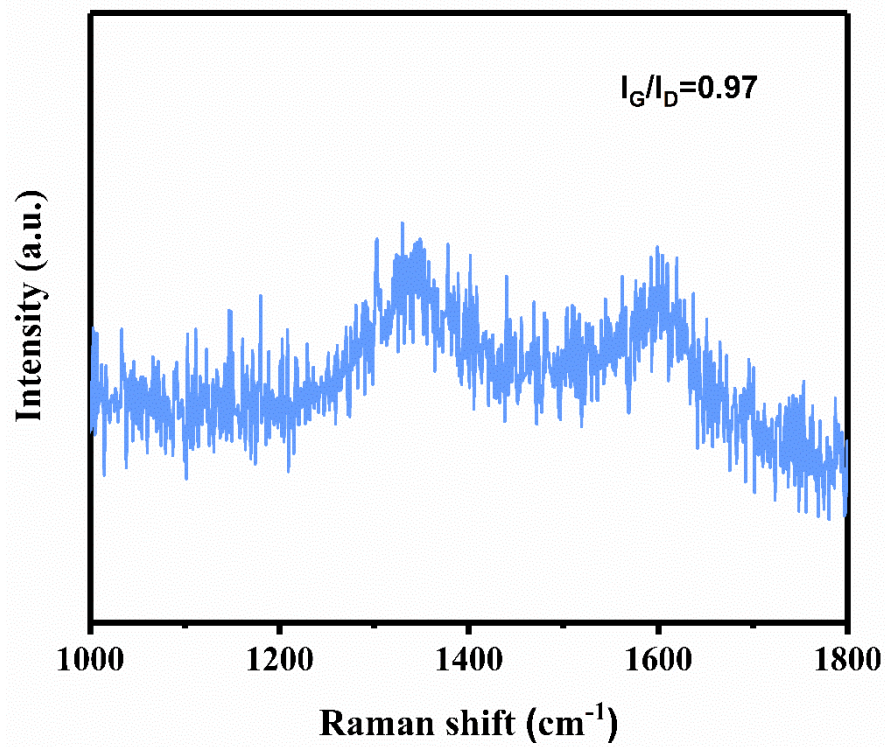

**Fig.S3** The Raman spectrum for 10%-CoNi/HPC-400.

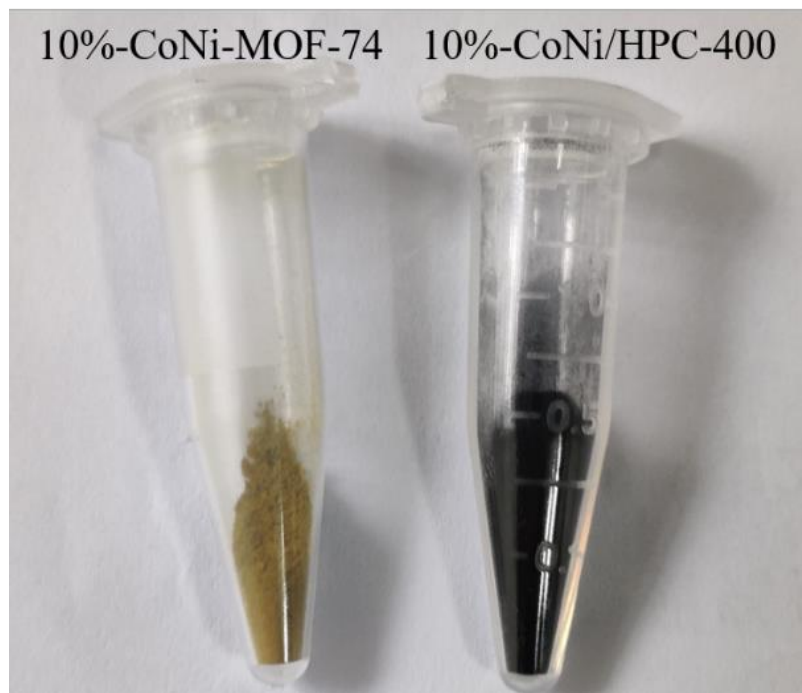

**Fig.S4** The color change of 10%-CoNi-MOF-74 in the carbonization.

---

**Table S1.** ICP results of catalysts and catalytic activities for the hydrolytic dehydrogenation of AB.

---

| <b>Sample</b>    | <b>Co <i>Wt%</i></b> | <b>Ni <i>Wt%</i></b> | <b>TOF (<i>min<sup>-1</sup></i>)</b> |
|------------------|----------------------|----------------------|--------------------------------------|
| Ni/HPC-400       | —                    | 73.1%                | 1.10                                 |
| 10%-CoNi/HPC-400 | 5.6%                 | 37.48%               | 27.22                                |
| 30%-CoNi/HPC-400 | 28.64%               | 43.32%               | 7.18                                 |
| 50%-CoNi/HPC-400 | 36.93%               | 25.80%               | 3.53                                 |
| 70%-CoNi/HPC-400 | 28.40%               | 9.13%                | 3.25                                 |
| Co/HPC-400       | 36.85%               | —                    | 0.96                                 |
| 10%-CoNiHPC-300  | 5.06%                | 43.58%               | 3.35                                 |
| 10%-CoNi/HPC-500 | 11.92%               | 87.50%               | 0.36                                 |
| 10%-CoNi/HPC-600 | 10.05%               | 89.46%               | 0.04                                 |
| 10%-CoNi/HPC-700 | 11.02%               | 88.27%               | 0.02                                 |

---
